# Supplementary material
Source: Springer Nature journal article supplement (https://mijn.bsl.nl/resource/supplementary/13047_2009_104_MOESM1_ESM.pdf/7109786)

## General practitioner (GP)

GP Management Plan (GPMP)

Item 721

Medicare fee = \$124.95

+

Team Care Arrangements (TCAs)

Item 723

Medicare fee = \$98.95

Review of GPMP

Item 725

Medicare fee = \$62.50

Review of TCA

Item 727

Once every 6 months

Medicare fee = \$62.50

## Podiatrist

May require initial consultation  
about TCA  
No rebate

Provision of service

Item 10962

Maximum of 5 per year  
(may be shared between two  
allied health providers)

Rebate = \$48.95

Written report to GP on first  
and last visit if providing  
multiple services, otherwise  
after each service  
No rebate

May contribute to TCA review  
No rebate

*Referral*

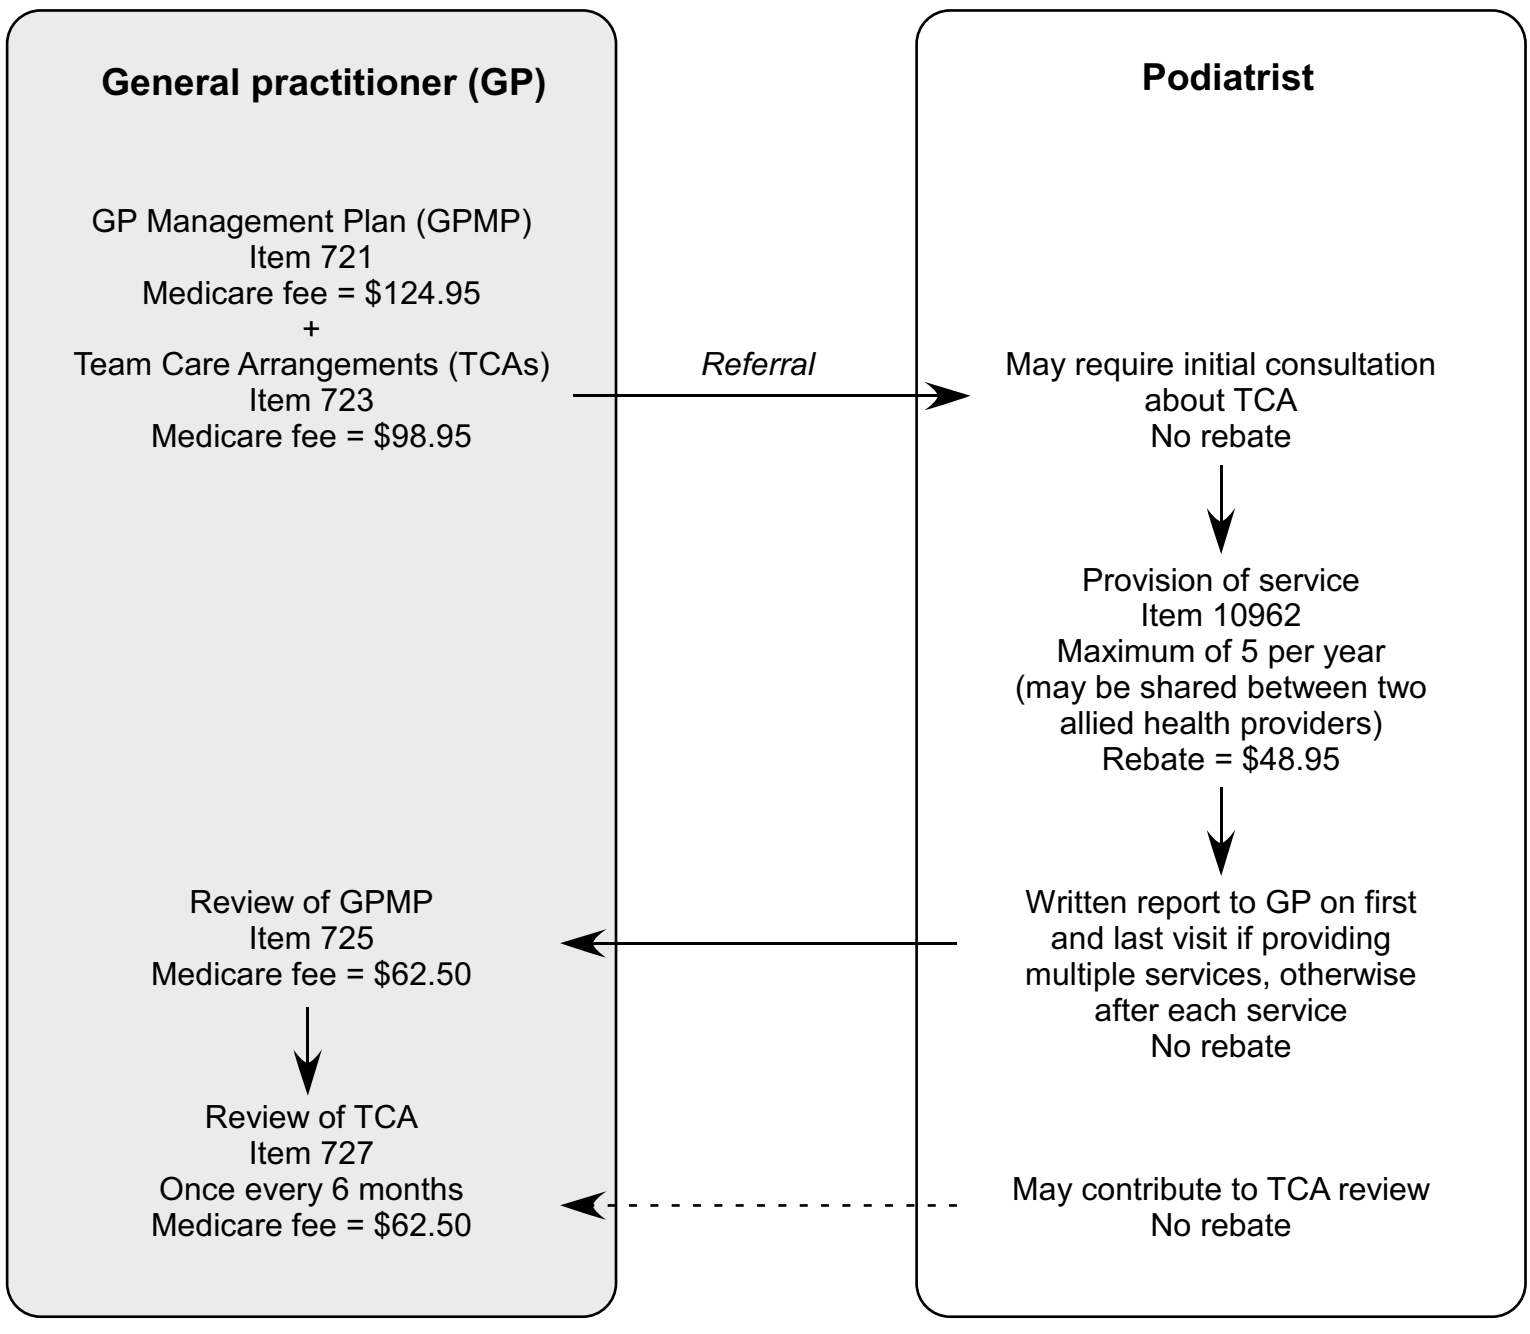

Supplement: MOESM1 [file 7109786]
